# Supplementary material for: Cobalt hexacyanoferrate nanoparticles for wet-processed brown–bleached electrochromic devices with hybridization of high-spin/low-spin phases
Source: Royal Society of Chemistry journal article supplement (doi:10.1039/c7tc02576a), 2017-01-01
Supplement: c7tc02576a1.pdf [file c7tc02576a1.pdf]

## Supplementary information

Cobalt hexacyanoferrate nanoparticles for printed brown–bleached electrochromic devices with hybridization of high-spin/low-spin phases

Elghool Kholoud<sup>a,b</sup>, Hiroshi Watanabe<sup>a</sup>, Akira Takahashi<sup>a</sup>, Mahmoud M. Emar<sup>b</sup>, Bashir A. Abd-El-Nabey<sup>b</sup>, Masato Kurihara<sup>c</sup>, Kazuki Tajima<sup>a</sup>, Tohru Kawamoto<sup>a,\*</sup>

a.Nanomaterial Research Institute, National Institute of Advanced Industrial Science and Technology (AIST), 1-1-1 Higashi, Tsukuba 305-8565, Japan, E-mail. k-tajima@aist.go.jp

b.Chemistry Department, Faculty of Science, Alexandria University, P.O. Box 426, Ibrahimia 21321, Alexandria, Egypt

c.Department of Material and Biological Chemistry, Yamagata University, 1-4-12 Kojirakawamachi, Yamagata, 990-8560, Japan

\*Corresponding Author: E-mail: tohru.kawamoto@aist.go.jp

### 1. Conditions in the experiment

Table SI 1. Conditions for spin coating yielding films with various thicknesses

| Film Number | Coating Conditions   |                       | Film Thickness<br>( $\mu\text{m}$ ) |
|-------------|----------------------|-----------------------|-------------------------------------|
|             | Rotation power (rpm) | Time of coating (Sec) |                                     |
| 1           | 300                  | 200                   | 1.5                                 |
| 2           | 500                  | 200                   | 1.1                                 |
| 3           | 900                  | 200                   | 0.8                                 |

Table SI 2. Conditions for cyclic voltammetry analysis for the CoHCF thin films

|                       |       |
|-----------------------|-------|
| Initial potential (V) | 1.4   |
| Maximum potential (V) | 1.4   |
| Minimum Potential (V) | -0.4  |
| Scan rate (V/S)       | 0.005 |
| Sensitivity (A/V)     | 0.001 |

Table SI 3. Potential profile for sequential potential switching

| Film Thickness    | First step potential (V) | First step Time (sec.) | Second step potential (V) | Second step Time (sec.) |
|-------------------|--------------------------|------------------------|---------------------------|-------------------------|
| 1.5 $\mu\text{m}$ | 1.4                      | 5400                   | -0.4                      | 5400                    |
| 1.1 $\mu\text{m}$ | 1.4                      | 4000                   | -0.4                      | 4000                    |
| 0.8 $\mu\text{m}$ | 1.4                      | 2400                   | -0.4                      | 2400                    |

Table SI 4. Voltage profile for sequential potential switching with CoHCF/ZnHCF ECD

|                           |      |
|---------------------------|------|
| First step potential (V)  | -2.0 |
| First step Time (S)       | 300  |
| Second step potential (V) | +2.0 |
| Second step Time (S)      | 120  |
| Cycles                    | 120  |

## 2. Additional figures

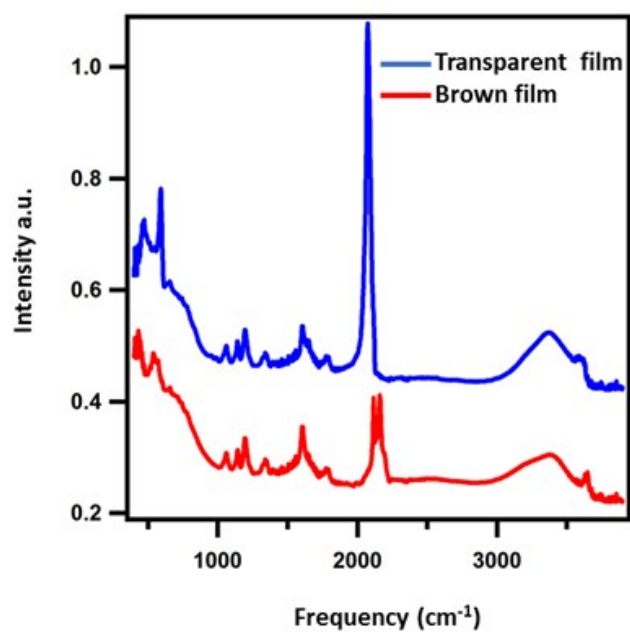

Figure S1. Infra-red spectra of transparent reduced film and brown oxidized one
